# Supplementary material
Source: publisher figshare collection journal article supplement (https://acs.figshare.com/ndownloader/files/4278014)
Supplement: Supplementary file 1 [file 4278014]

# Supporting Information

## Determinants of Serum Polybrominated Diphenyl Ether (PBDE) Levels among Pregnant Women in the CHAMACOS Cohort

Rosemary Castorina<sup>1\*</sup>, Asa Bradman<sup>1</sup>, Andreas Sjödin<sup>2</sup>, Laura Fenster<sup>3</sup>, Richard S. Jones, Kim Harley<sup>1</sup>, Ellen A. Eisen<sup>1,4</sup>, Brenda Eskenazi<sup>1</sup>

---

**19 pages, 4 tables, 3 figures**

### **Authors' affiliation:**

<sup>1</sup> Center for Environmental Research and Children's Health (CERCH), School of Public Health, University of California, Berkeley, CA, USA

<sup>2</sup> Division of Laboratory Sciences, National Center for Environmental Health, Centers for Disease Control and Prevention, 4770 Buford Highway, NE Mail Stop F-17, Atlanta, GA 30341

<sup>3</sup> Division of Environmental and Occupational Disease Control, California Department of Public Health Richmond, CA, USA

<sup>4</sup> Division of Environmental Health, School of Public Health, UC Berkeley, CA USA

### **\*Corresponding author:**

Rosemary Castorina, PhD

Center for Environmental Research and Children's Health (CERCH)

School of Public Health

University of California, Berkeley

1995 University Avenue, Suite 265

Berkeley, CA 94704

Phone: (510) 642-9075 Fax: (510) 642-9083

rcastori@berkeley.edu

## CONTENTS

- **Table S1.** Molecular weights of PBDE congeners (g/mol) (**page S3**)
- **Table S2.** Molar PBDE concentrations in CHAMACOS maternal prenatal and delivery serum samples (pmol/g lipid) (**page S4**)
- **Table S3.** Demographic, housing and diet information and total molar PBDE concentrations among pregnant women in the CHAMACOS cohort (pmol/g lipid) (n=416) (**pages S5 - S6**)
- **Description of serum PBDE congener analytical laboratory methods** (**pages S7**)
- **Tables S4a-S4d.** Results from multiple regression analyses of log-transformed PBDE congener levels (ng/g lipid) and exposure predictors in pregnant women (n=352) (**pages S8 - S11**)
- **Figure S1.** Total maternal PBDE levels by years residing in the U.S. (n=416) (**page S12**)
- **Figure S2a.** Plot of matched maternal prenatal (~26 weeks gestation) and delivery total serum PBDE levels (n=21) (sum of 10 congeners) (log-transformed) (**page S13**)
- **Figures S2b – S2e.** Plots of matched maternal prenatal (~26 weeks gestation) and delivery serum PBDE congener levels (n=21) (log-transformed) (**pages S14 – S17**)
- **Figure S3a.** Ratio of BDE-99 to BDE-47 by years residing in the U.S. (n=416) (**page S18**).
- **Figure S3b.** Ratio of BDE-99 to BDE-47 by years residing in the U.S. (truncated at 10 years; n=300) (**page S19**).

**Table S1.** Molecular weights of PBDE congeners (g/mol).

| <b>Congener</b> | <b>IUPAC Name</b>                           | <b>Molecular weight</b> |
|-----------------|---------------------------------------------|-------------------------|
| BDE-17          | 2,2', 4 - tribromodiphenyl ether            | 406.91                  |
| BDE-28          | 2,4,4' - tribromodiphenyl ether             | 406.90                  |
| BDE-47          | 2,2',4,4' - tetrabromodiphenyl ether        | 485.81                  |
| BDE-66          | 2,3',4,4' - tetrabromodiphenyl ether        | 485.81                  |
| BDE-85          | 2,2',3,4,4' - pentabromodiphenyl ether      | 564.69                  |
| BDE-99          | 2,2',4,4',5 - pentabromodiphenyl ether      | 564.71                  |
| BDE-100         | 2,2',4,4',6 - pentabromodiphenyl ether      | 564.71                  |
| BDE-153         | 2,2',4,4',5,5' - hexabromodiphenyl ether    | 643.61                  |
| BDE-154         | 2,2',4,4',5,6' - hexabromodiphenyl ether    | 643.60                  |
| BDE-183         | 2,2',3,4,4',5,6' - heptabromodiphenyl ether | 722.51                  |

**Table S2.** Molar PBDE concentrations in CHAMACOS maternal prenatal and delivery serum samples (pmol/g lipid).

|                                        | <b>n</b> | <b>LOD<sup>a</sup></b> | <b>DF (%)</b> | <b>Geo Mean (95% CI)</b> | <b>Min</b> | <b>25th</b> | <b>50th</b> | <b>75th</b> | <b>90th</b> | <b>Max</b> |
|----------------------------------------|----------|------------------------|---------------|--------------------------|------------|-------------|-------------|-------------|-------------|------------|
| <b>BDE-47</b>                          |          |                        |               |                          |            |             |             |             |             |            |
| Maternal prenatal (26 wk)              | 321      | 1.5                    | 99.7          | 30.6 (27.3, 34.2)        | <LOD       | 15.8        | 29.9        | 51.0        | 103.8       | 1567       |
| Maternal delivery                      | 116      | 0.3                    | 99.2          | 26.4 (22.1, 31.6)        | <LOD       | 13.9        | 25.9        | 47.5        | 81.6        | 455        |
| <b>BDE-99</b>                          |          |                        |               |                          |            |             |             |             |             |            |
| Maternal prenatal (26 wk)              | 321      | 0.4                    | 99.7          | 7.6 (6.8, 8.5)           | <LOD       | 4.0         | 6.7         | 11.4        | 22.5        | 527        |
| Maternal delivery                      | 116      | 0.3                    | 99.2          | 5.8 (4.8, 6.9)           | <LOD       | 2.7         | 5.3         | 10.8        | 18.5        | 162        |
| <b>BDE-100</b>                         |          |                        |               |                          |            |             |             |             |             |            |
| Maternal prenatal (26 wk)              | 321      | 0.4                    | 99.7          | 4.7 (4.2, 5.3)           | <LOD       | 2.6         | 4.3         | 7.4         | 14.9        | 245        |
| Maternal delivery                      | 116      | 0.3                    | 99.2          | 4.2 (3.6, 5.0)           | <LOD       | 2.3         | 4.3         | 7.8         | 12.3        | 52.1       |
| <b>BDE-153</b>                         |          |                        |               |                          |            |             |             |             |             |            |
| Maternal prenatal (26 wk)              | 321      | 0.4                    | 99.7          | 3.6 (3.2, 4.0)           | <LOD       | 2.0         | 3.1         | 5.7         | 11.5        | 150.5      |
| Maternal delivery                      | 116      | 0.3                    | 100           | 3.3 (2.8, 3.8)           | 0.7        | 1.7         | 3.5         | 5.8         | 9.5         | 24.1       |
| <b>Sum of 4 congeners<sup>b</sup></b>  |          |                        |               |                          |            |             |             |             |             |            |
| Maternal prenatal (26 wk)              | 321      | --                     | 100           | 47.8 (42.8, 53.2)        | 5.9        | 24.7        | 45.0        | 76.5        | 152.1       | 2489       |
| Maternal delivery                      | 116      | --                     | 100           | 41.0 (34.7, 48.5)        | 3.1        | 21.4        | 39.6        | 72.0        | 120.5       | 686        |
| <b>Sum of 10 congeners<sup>c</sup></b> |          |                        |               |                          |            |             |             |             |             |            |
| Maternal prenatal (26 wk)              | 321      | --                     | 100           | 52.3 (47.0, 58.2)        | 7.6        | 27.2        | 50.1        | 81.2        | 164.2       | 2657       |
| Maternal delivery                      | 116      | --                     | 100           | 45.5 (38.8, 53.5)        | 6.4        | 24.3        | 42.5        | 77.9        | 130.0       | 736        |

<sup>a</sup> Average of LODs (ng/g lipid).<sup>b</sup> Molar sum of 4 PBDE congeners with DFs>95%: BDE-47; BDE-99; BDE-100; BDE-153.<sup>c</sup> Molar sum of 10 PBDE congeners: BDE-17; BDE-28; BDE-47; BDE-66; BDE-85; BDE-99; BDE-100; BDE-153; BDE-154; BDE-183.

**Table S3.** Demographic, housing and diet information and total molar PBDE concentrations among pregnant women in the CHAMACOS cohort (n=416).

|                                    | n (%)      | Molar sum (pmol/g lipid)<br>GeoMean (95% CI) <sup>a</sup> |
|------------------------------------|------------|-----------------------------------------------------------|
| <b>Demographic information</b>     |            |                                                           |
| Age categories                     |            |                                                           |
| ≤25 years                          | 243 (58.4) | 54.3 (48.3, 61.2)                                         |
| >25 years                          | 173 (41.6) | 56.0 (48.6, 64.5)                                         |
| Country of birth                   |            |                                                           |
| US Born                            | 57 (13.7)  | 99.4** (76.5, 129.2)                                      |
| Born in Mexico/other               | 359 (86.3) | 50.1 (45.6, 55.0)                                         |
| Time residing in the U.S.          |            |                                                           |
| ≤5 years                           | 224 (53.9) | 44.6 (39.5, 50.5)                                         |
| 6 to 10 years                      | 83 (19.9)  | 59.5 (50.9, 69.4)                                         |
| 11+ years                          | 62 (14.9)  | 62.5 (50.3, 77.7)                                         |
| Entire life                        | 47 (11.3)  | 109.7** (81.0, 148.5)                                     |
| Years residing in the U.S.         |            |                                                           |
| Pearson r                          | 416 (100)  | 0.33**                                                    |
| Education                          |            |                                                           |
| ≤ 6 years school                   | 179 (43.0) | 46.8 (41.4, 53.0)                                         |
| 7-12 years school                  | 151 (36.3) | 57.4 (49.1, 67.0)                                         |
| High school grad +                 | 86 (20.7)  | 71.4* (57.4, 89.0)                                        |
| Poverty                            |            |                                                           |
| Above poverty threshold            | 143 (36.7) | 59.4 (49.9, 70.7)                                         |
| At or below poverty threshold      | 247 (63.3) | 53.5 (48.1, 59.5)                                         |
| Pre-pregnancy BMI categories       |            |                                                           |
| Under/Normal weight (<25)          | 164 (39.5) | 47.8 (41.7, 54.8)                                         |
| Overweight/Obese (≥25)             | 251 (60.5) | 60.4* (53.6, 68.1)                                        |
| Pre-pregnancy BMI                  |            |                                                           |
| Pearson r                          | 415 (99.8) | 0.15*                                                     |
| Weight gain during pregnancy (lbs) |            |                                                           |
| Pearson r                          | 409 (98.3) | -0.10*                                                    |
| Parity                             |            |                                                           |
| 0 children                         | 151 (36.3) | 49.6 (42.4, 58.2)                                         |
| 1 child                            | 128 (30.8) | 56.4 (47.6, 66.9)                                         |
| ≥2 children                        | 137 (32.9) | 60.2 (52.3, 69.3)                                         |

\* ANOVA p-value<0.05; \*\* p-value<0.001

<sup>a</sup> Geometric means and 95% confidence interval except when Pearson coefficient (r) is presented.

**Table S3 (cont).** Demographic, housing and diet information and total molar PBDE concentrations among pregnant women in the CHAMACOS cohort (n=416).

|                                         | n (%)      | Molar sum (pmol/g lipid)<br>GeoMean (95% CI) <sup>a</sup> |
|-----------------------------------------|------------|-----------------------------------------------------------|
| Breastfeeding history previous births   |            |                                                           |
| None                                    | 192 (46.2) | 53.3 (46.3, 61.4)                                         |
| <12 months                              | 118 (28.4) | 57.8 (49.7, 67.3)                                         |
| ≥12 months                              | 106 (25.5) | 55.2 (45.9, 66.3)                                         |
| Maternal smoking during pregnancy       |            |                                                           |
| No                                      | 393 (94.5) | 54.4 (49.6, 59.6)                                         |
| Yes                                     | 23 (5.5)   | 67.4 (43.9, 103.5)                                        |
| <b>Housing characteristics</b>          |            |                                                           |
| No. pieces of stuffed furniture in home |            |                                                           |
| 0                                       | 48 (12.7)  | 45.8 (33.5, 62.5)                                         |
| 1-2                                     | 239 (63.1) | 52.8 (47.2, 59.1)                                         |
| 3 +                                     | 92 (24.3)  | 67.8* (54.7, 84.1)                                        |
| Any carpet in the home                  |            |                                                           |
| No                                      | 29 (7.7)   | 54.9 (36.7, 82.2)                                         |
| Yes                                     | 350 (92.3) | 55.1 (49.9, 60.9)                                         |
| % of rooms with carpet                  |            |                                                           |
| Pearson r                               | 379 (91.1) | 0.04                                                      |
| Resident density                        |            |                                                           |
| <1 person per room                      | 39 (10.4)  | 65.4 (45.5, 93.8)                                         |
| ≥1 person per room                      | 337 (89.6) | 54.1 (49.0, 59.8)                                         |
| Quality of housekeeping                 |            |                                                           |
| Less clean                              | 21 (5.5)   | 49.4 (35.0, 69.5)                                         |
| Average                                 | 207 (54.6) | 58.2 (50.3, 67.4)                                         |
| Excellent                               | 151 (39.8) | 52.3 (45.9, 59.5)                                         |
| <b>Diet</b>                             |            |                                                           |
| Daily servings of dairy                 |            |                                                           |
| Pearson r                               | 416 (99.8) | -0.06                                                     |
| Daily servings of meat                  |            |                                                           |
| Pearson r                               | 416 (99.8) | 0.05                                                      |
| Total daily fat intake                  |            |                                                           |
| Pearson r                               | 393 (94.5) | -0.04                                                     |
| Consumption of fish                     |            |                                                           |
| ≤1 per month                            | 226 (56.2) | 55.6 (49.1, 62.9)                                         |
| >1 per month                            | 176 (43.8) | 54.3 (47.2, 62.4)                                         |

\* ANOVA or Pearson's correlation p-value<0.05; \*\* p-value<0.001

<sup>a</sup> Geometric means and 95% confidence interval except when Pearson coefficient (r) is presented.

## Description of serum PBDE congener analytical laboratory methods

The methods used by the CDC for serum PBDE analysis have been described previously (Sjödin et al. 2004). Briefly, serum samples were fortified with  $^{13}\text{C}$ -labeled internal standards, and formic acid was added to the samples as a denaturant and the samples were finally diluted with water before solid phase extraction (SPE). Liquid handling before extraction was automated using a 215 Liquid Handler (Gilson Inc, Middleton, WI), and SPE was automated using the Rapid Trace SPE workstation (Caliper Life Sciences, Hopkinton, MA). Removal of coextracted lipids was performed on a two-layered cleanup cartridge packed in and SPE tube, containing silica (top layer) and a mixture of silica and sulfuric acid (bottom layer), using the SPE work stating for automation

Final analytical determination of target analytes is performed by gas chromatography-isotope dilution high resolution mass spectrometry (GC-IDHRMS).

## Reference

Sjödin, A.; Jones, R.S.; Lapeza, C.R.; Focant, J.F.; McGahee, E.E.; Patterson, D.G, Jr. Semiautomated high-throughput extraction and cleanup method for the measurement of polybrominated diphenyl ethers, polybrominated biphenyls, and polychlorinated biphenyls in human serum. *Anal. Chem.* **2004**, 76(7), 1921-1927.

**Table S4a.** Results from multiple regression analyses of log-transformed BDE-47 levels (ng/g lipid) and exposure predictors in pregnant women (n=352).

|                                                      | <b>% Change (95% CI)</b> | <b>p-value</b> |
|------------------------------------------------------|--------------------------|----------------|
| Years residing in the US (continuous)                | 4.2 (2.8, 5.5)           | <0.001         |
| Pre-pregnancy BMI (overweight/obese ( $\geq 25$ ))   | 21.7 (-2.0, 51.0)        | 0.08           |
| Weight gain during pregnancy (kgs)                   | -0.8 (-2.6, 0.9)         | 0.35           |
| No. pieces of stuffed furniture in home ( $\geq 3$ ) | 23.9 (-2.0, 56.8)        | 0.05           |
| SES (at or below poverty threshold)                  | -2.5 (-20.9, 20.1)       | 0.81           |

Model R-squared=0.13



**Table S4b.** Results from multiple regression analyses of log-transformed BDE-99 levels (ng/g lipid) and exposure predictors in pregnant women (n=352).

|                                                      | <b>% Change (95% CI)</b> | <b>p-value</b> |
|------------------------------------------------------|--------------------------|----------------|
| Years residing in the US (continuous)                | 3.1 (1.7, 4.5)           | <0.001         |
| Pre-pregnancy BMI (overweight/obese ( $\geq 25$ ))   | 23.4 (-1.1, 54.1)        | 0.06           |
| Weight gain during pregnancy (kgs)                   | -0.6 (-2.4, 1.2)         | 0.52           |
| No. pieces of stuffed furniture in home ( $\geq 3$ ) | 33.3 (4.7, 69.6)         | 0.02           |
| SES (at or below poverty threshold)                  | -0.5 (-19.8, 23.2)       | 0.96           |

Model R-squared=0.10

**Table S4c.** Results from multiple regression analyses of log-transformed BDE-100 levels (ng/g lipid) and exposure predictors in pregnant women (n=352).

|                                                      | <b>% Change (95% CI)</b> | <b>p-value</b> |
|------------------------------------------------------|--------------------------|----------------|
| Years residing in the US (continuous)                | 4.7 (3.3, 6.0)           | <0.001         |
| Pre-pregnancy BMI (overweight/obese ( $\geq 25$ ))   | 12.8 (-8.5, 39.0)        | 0.26           |
| Weight gain during pregnancy (kgs)                   | -1.3 (-3.0, 0.4)         | 0.14           |
| No. pieces of stuffed furniture in home ( $\geq 3$ ) | 26.7 (0.9, 59.0)         | 0.04           |
| SES (at or below poverty threshold)                  | 2.2 (-16.5, 25.0)        | 0.83           |

Model R-squared=0.16

**Table S4d.** Results from multiple regression analyses of log-transformed BDE-153 levels (ng/g lipid) and exposure predictors in pregnant women (n=352).

|                                                      | <b>% Change (95% CI)</b> | <b>p-value</b> |
|------------------------------------------------------|--------------------------|----------------|
| Years residing in the US (continuous)                | 5.4 (4.2, 6.7)           | <0.001         |
| Pre-pregnancy BMI (overweight/obese ( $\geq 25$ ))   | -8.6 (-24.4, 10.6)       | 0.36           |
| Weight gain during pregnancy (kgs)                   | -2.1 (-3.6, -0.5)        | 0.009          |
| No. pieces of stuffed furniture in home ( $\geq 3$ ) | 27.6 (3.7, 57.0)         | 0.02           |
| SES (at or below poverty threshold)                  | 4.9 (-12.7, 26.1)        | 0.61           |

Model R-squared=0.22

**Figure S1.** Total maternal PBDE levels by years residing in the U.S. (n=416).

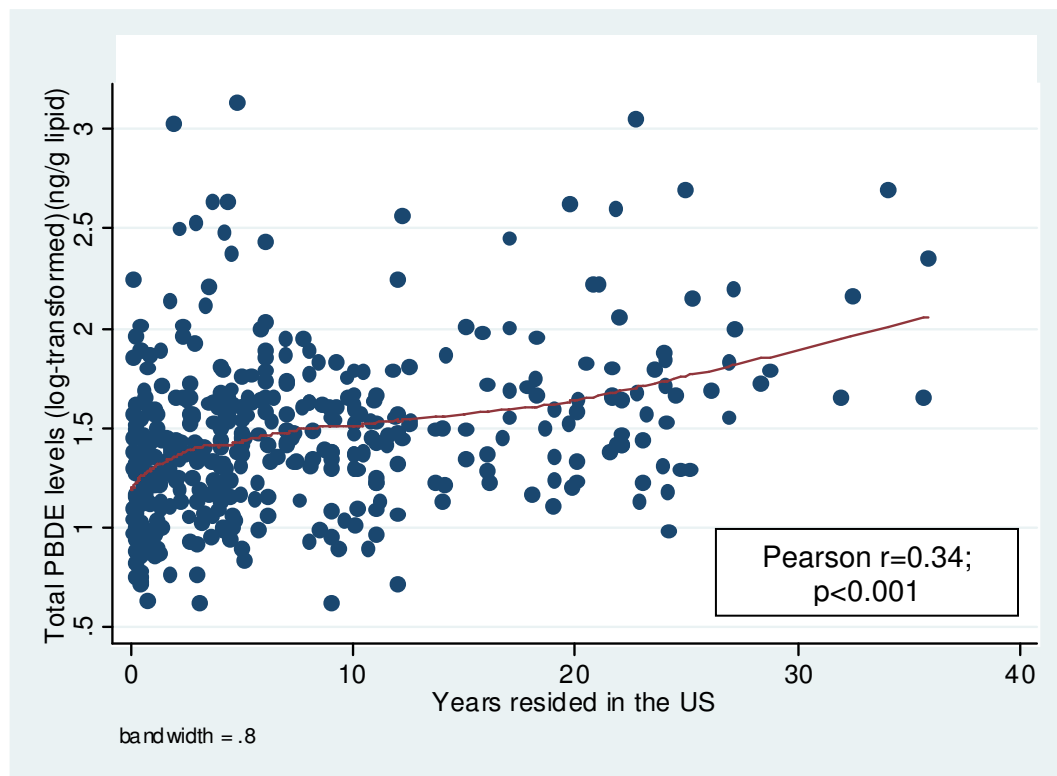

**Figure S2a.** Plot of matched maternal prenatal (~26 weeks gestation) and delivery total serum PBDE levels (n=21) (sum of 10 congeners) (log-transformed).

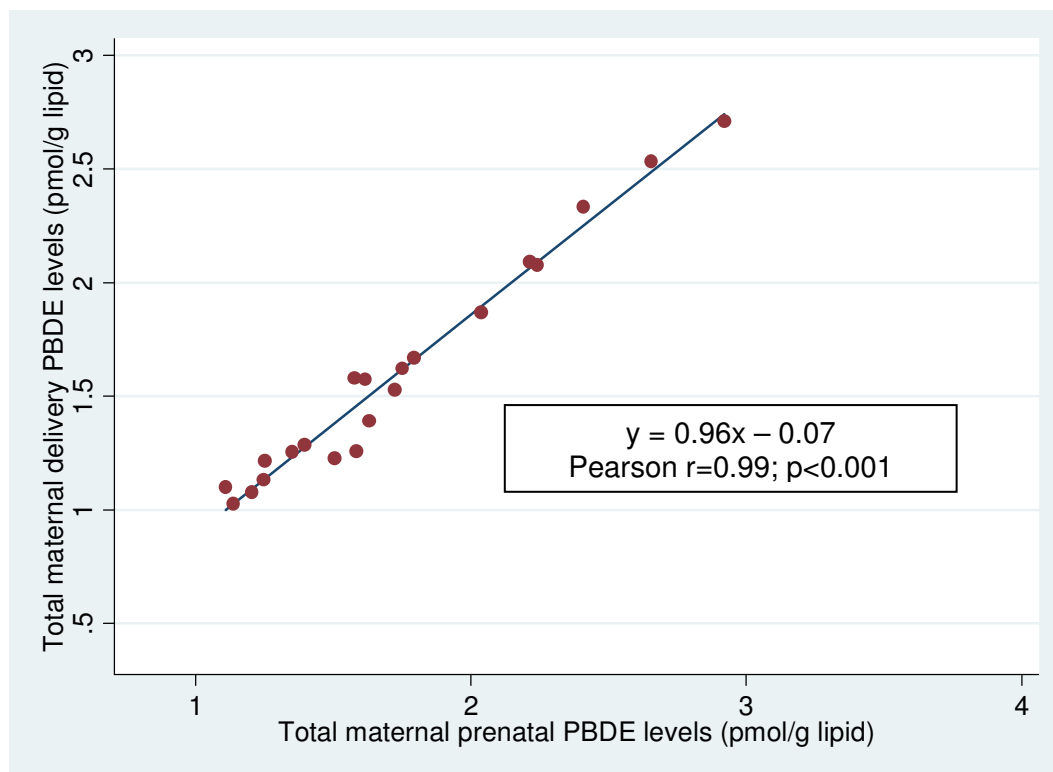

**Figure S2b.** Plot of matched maternal prenatal (~26 weeks gestation) and delivery serum BDE-47 levels (n=21) (log-transformed).

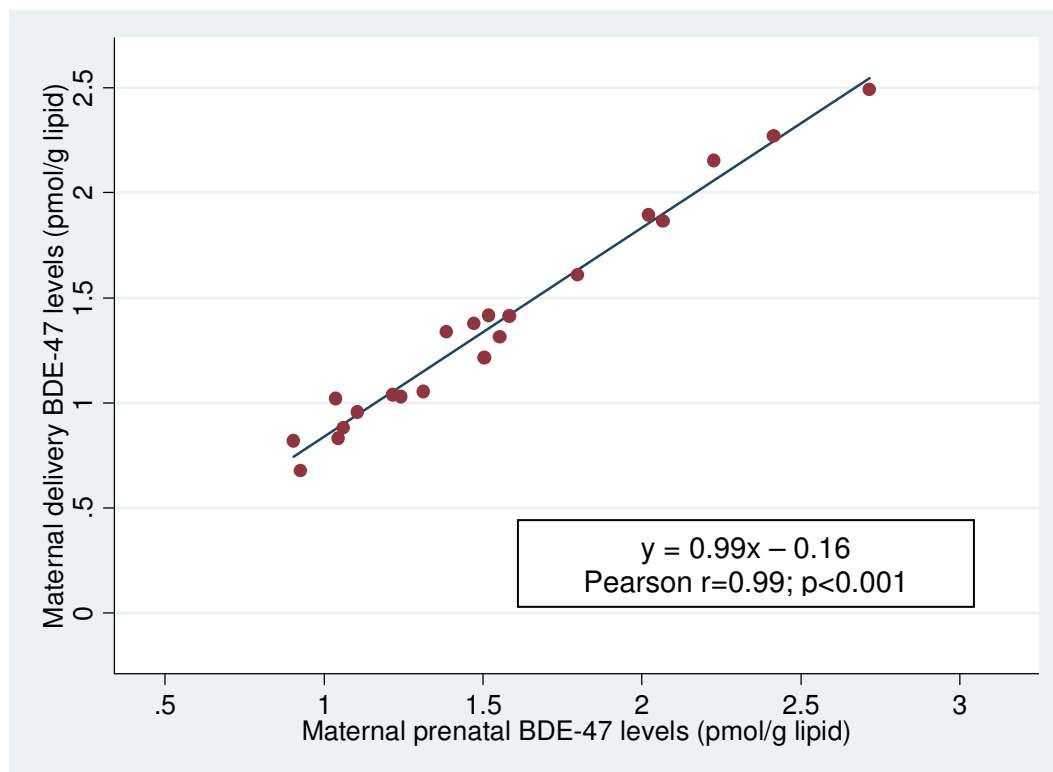

**Figure S2c.** Plot of matched maternal prenatal (~26 weeks gestation) and delivery serum BDE-99 levels (n=21) (log-transformed).

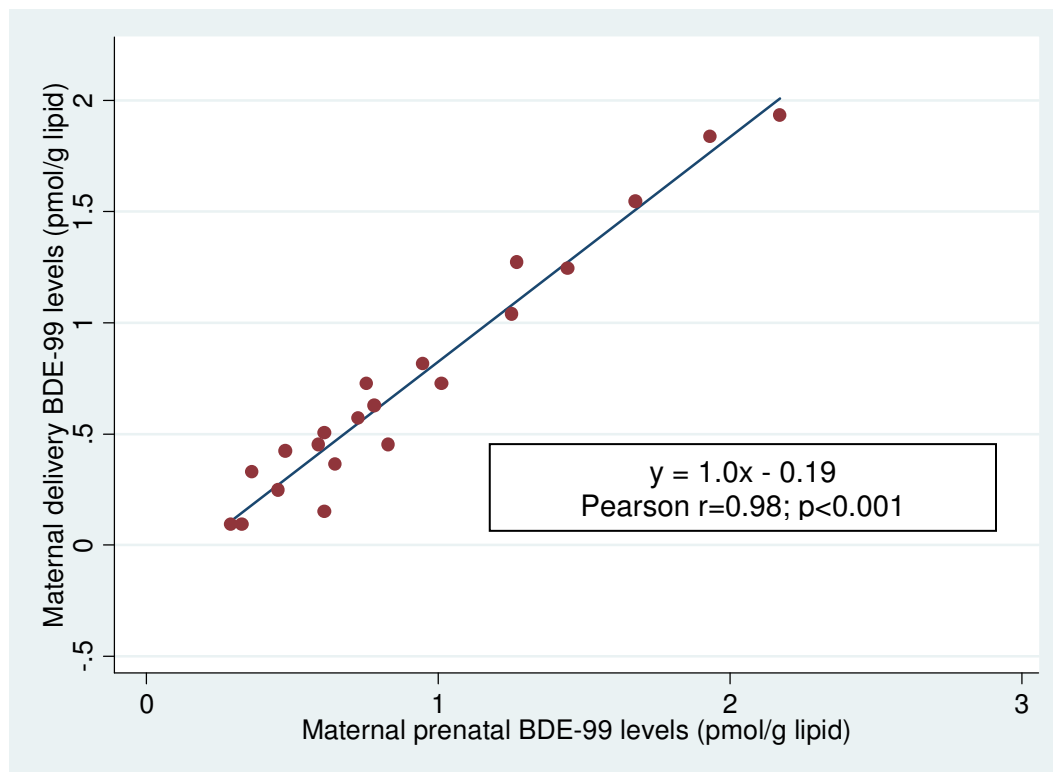

**Figure S2d.** Plot of matched maternal prenatal (~26 weeks gestation) and delivery serum BDE-100 levels (n=21) (log-transformed).

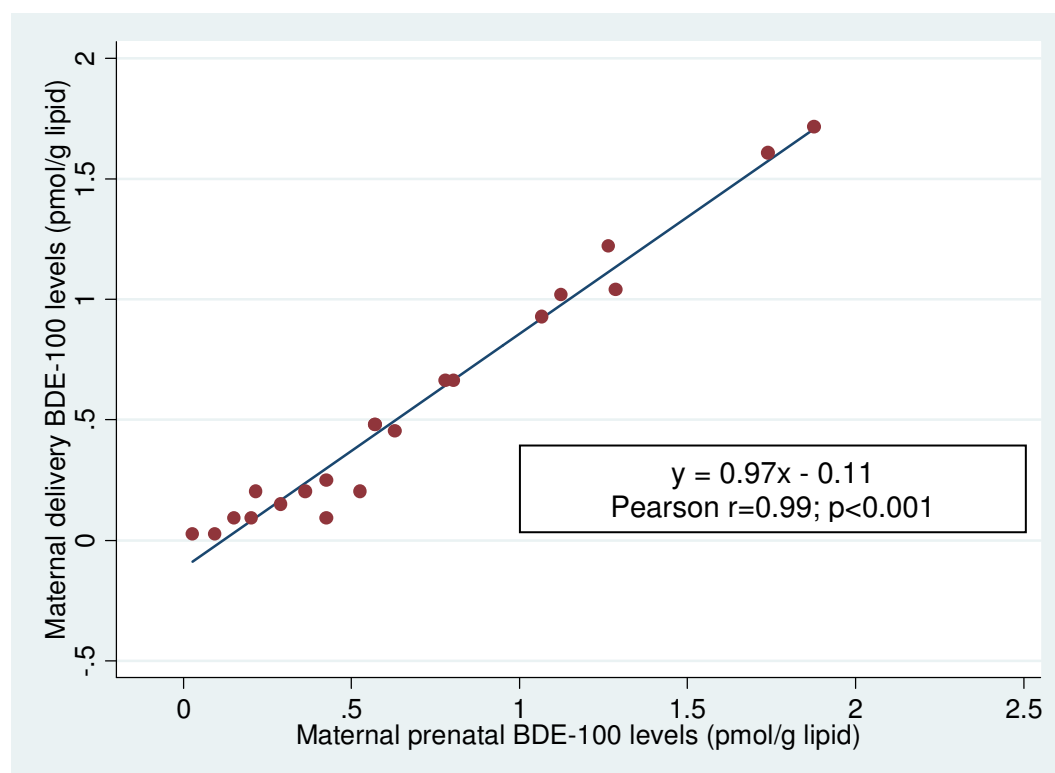



**Figure S2e.** Plot of matched maternal prenatal (~26 weeks gestation) and delivery total serum BDE-153 (n=21) (log-transformed).

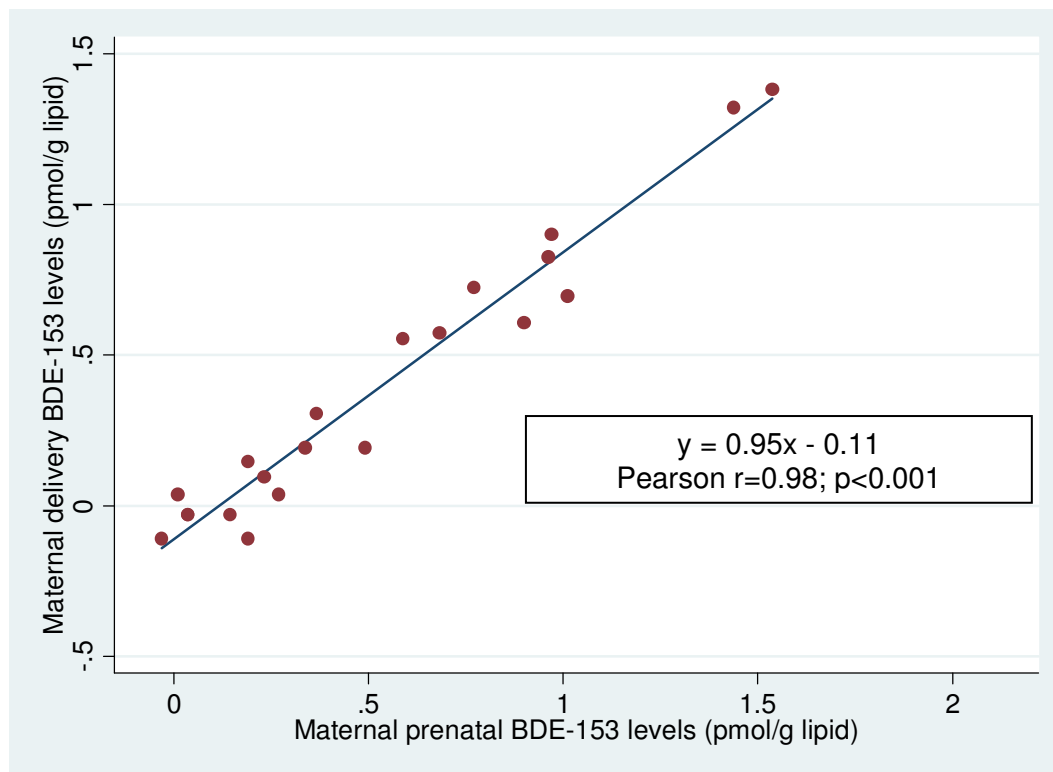

**Figure S3a.** Ratio of BDE-99 to BDE-47 by years residing in the U.S. (n=416).

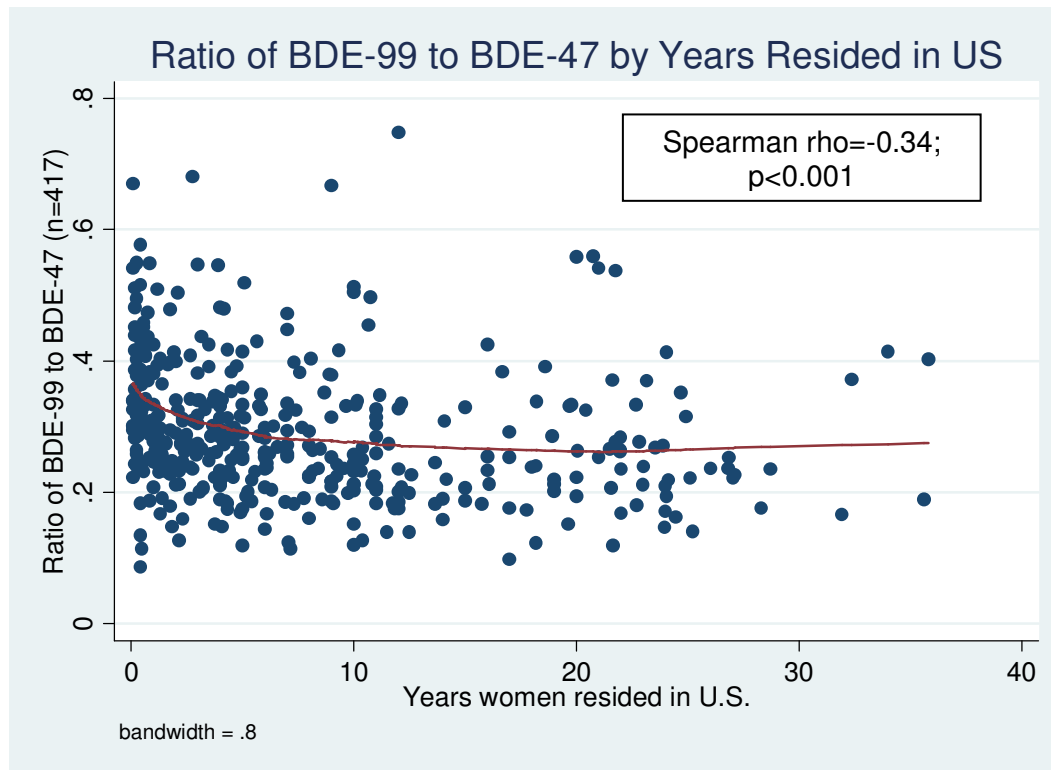

*Dropping 3 observations with ratio's >1*

**Figure S3b.** Ratio of BDE-99 to BDE-47 by years residing in the U.S. (truncated at 10 years; n=300).

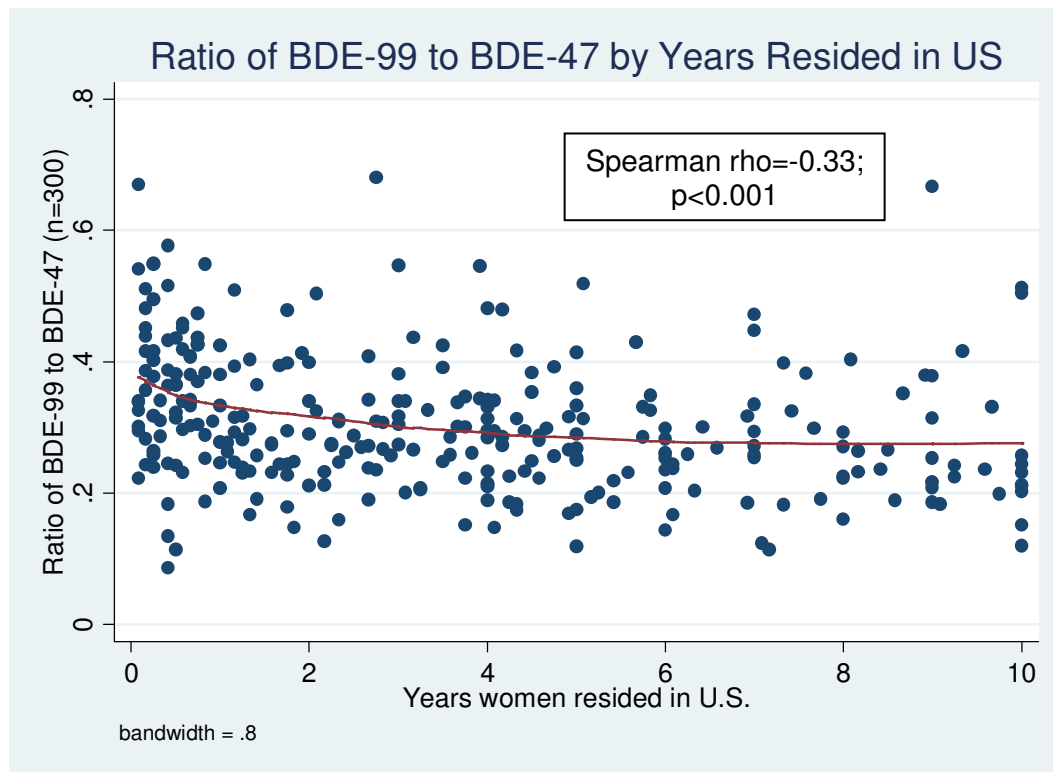

*Dropping 3 observations with ratio's >1*
